# Supplementary material for: Effect of implementation of the MOREOB program on adverse maternal and neonatal birth outcomes in Ontario, Canada: a retrospective cohort study
Source: Springer Nature journal article supplement (doi:10.1186/s12884-019-2296-5), 2019-05-03

Additional file 3: Crude outcome rates over time, Ontario, Canada, 2002 to 2014

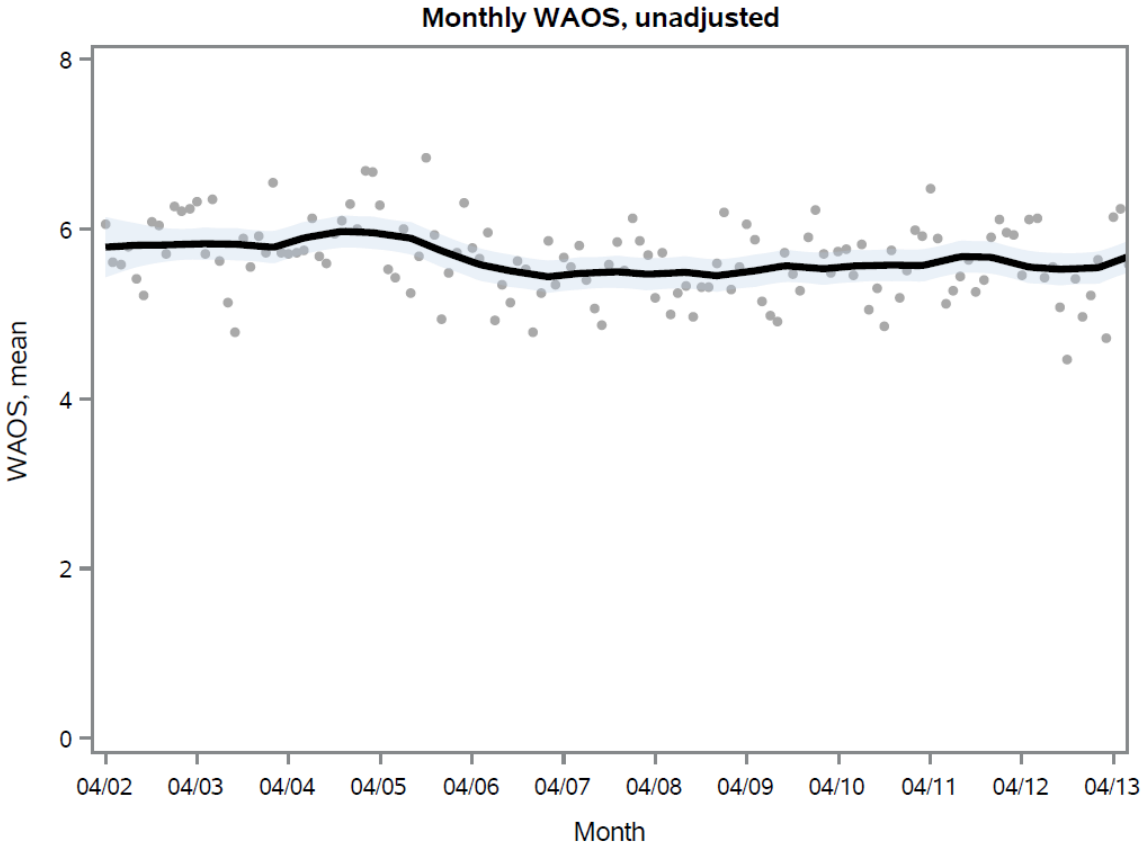

Monthly AOI, unadjusted

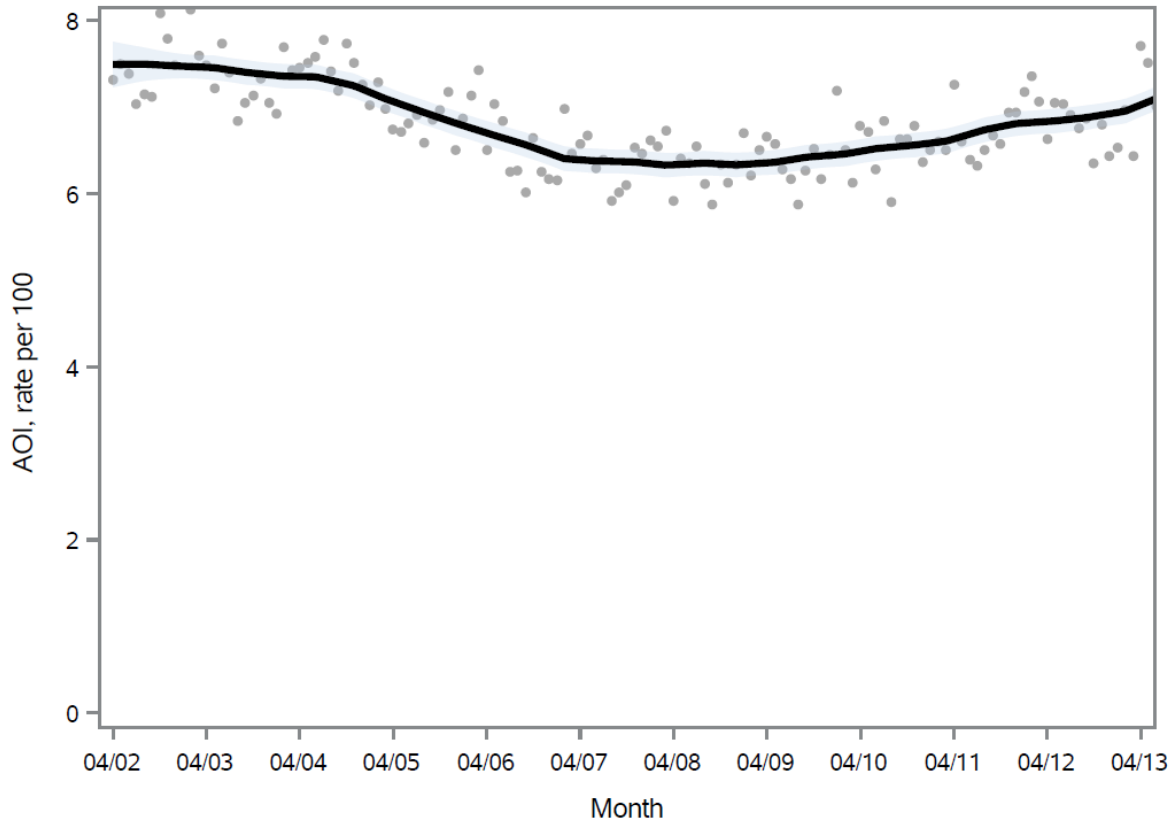

Monthly maternal death rate

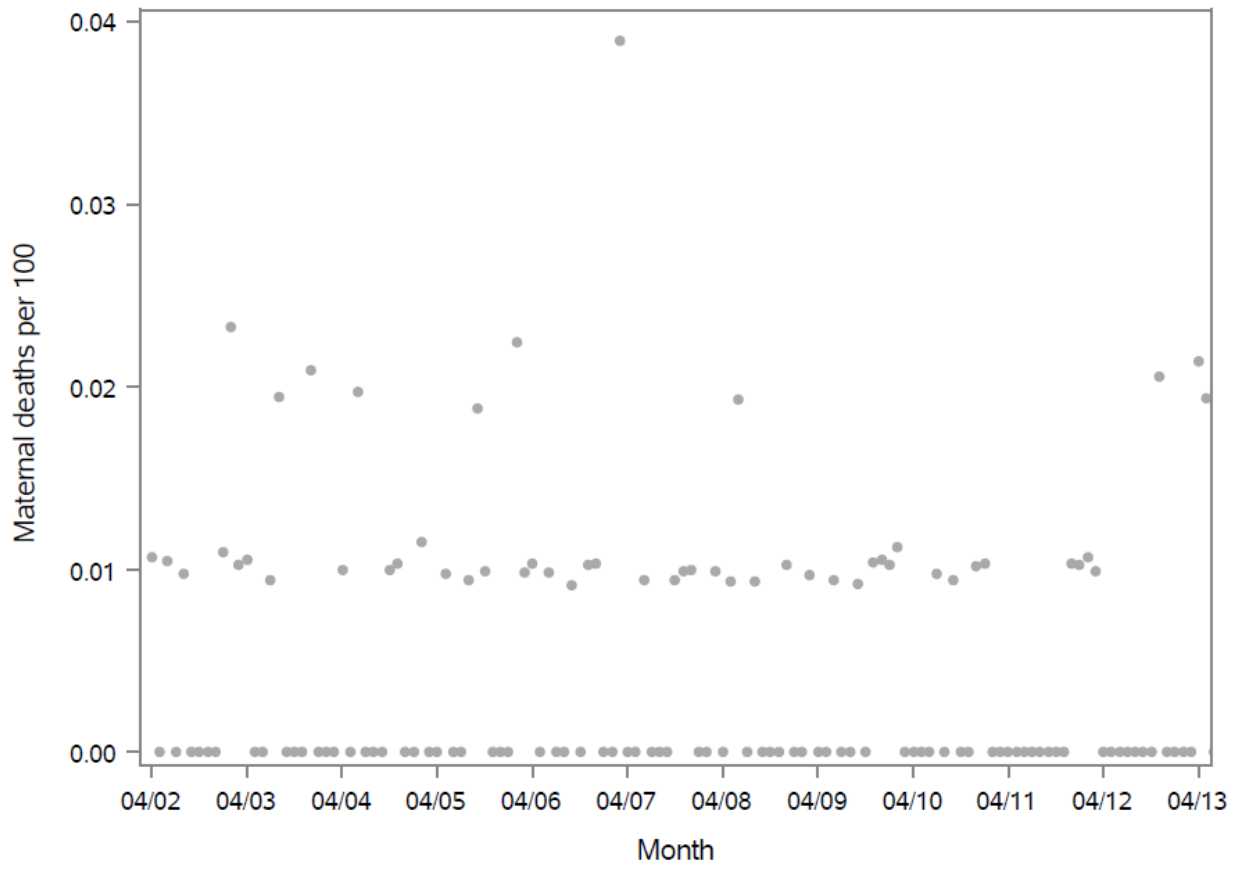

Neonatal death rate

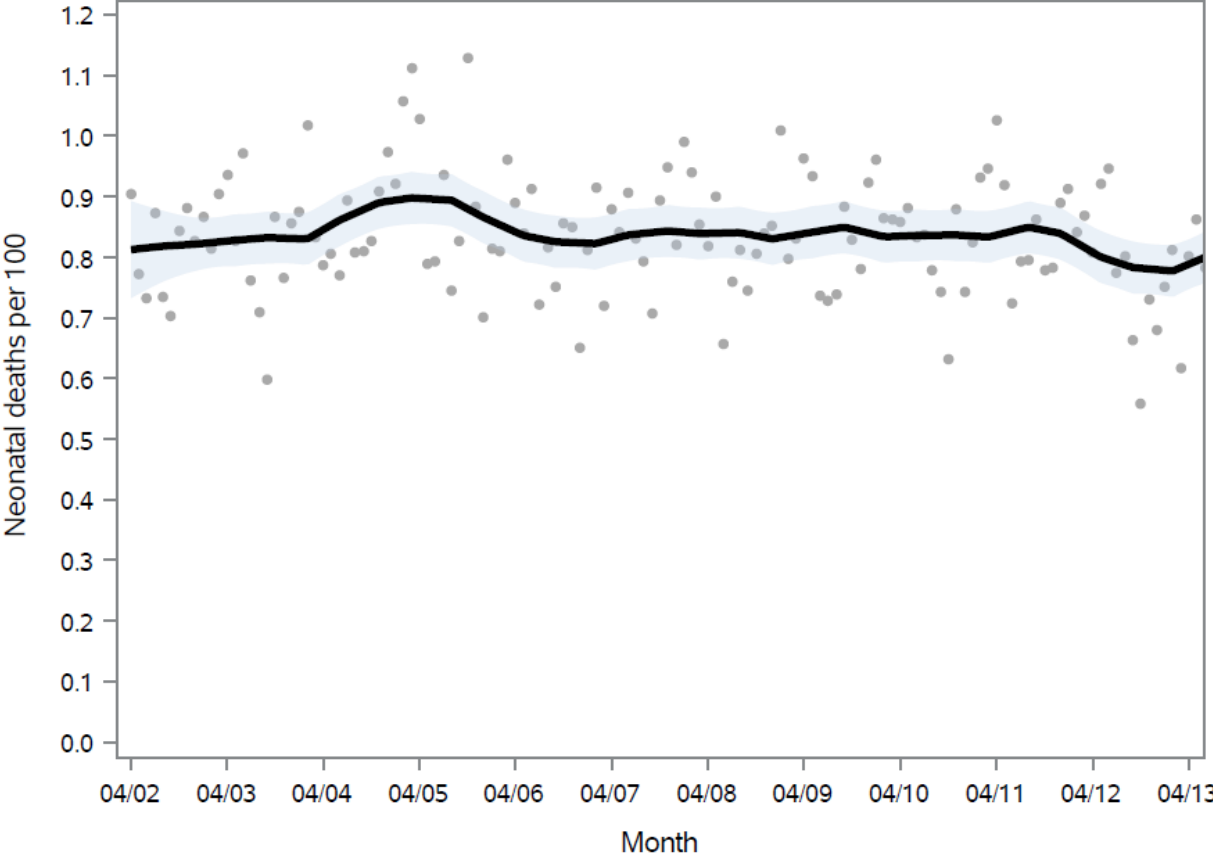

Maternal ICU admission rate

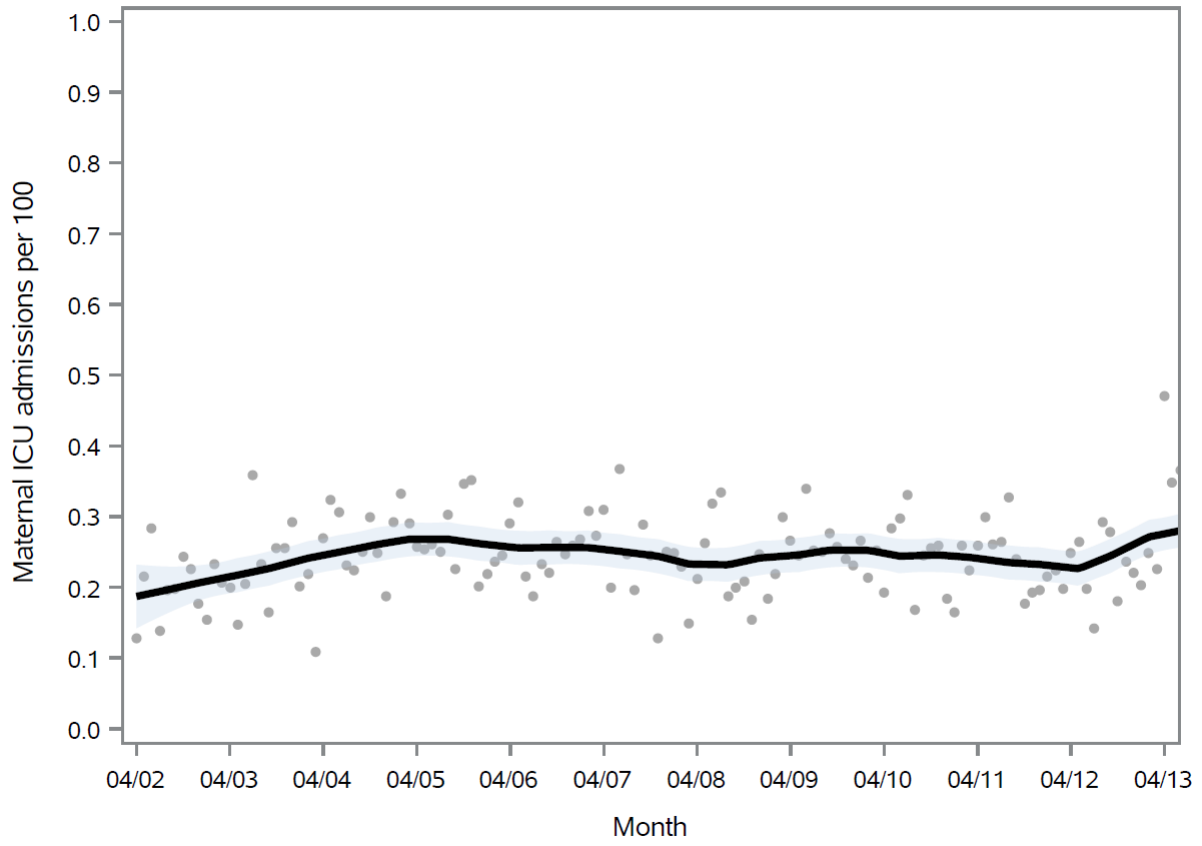

### Birth trauma rate

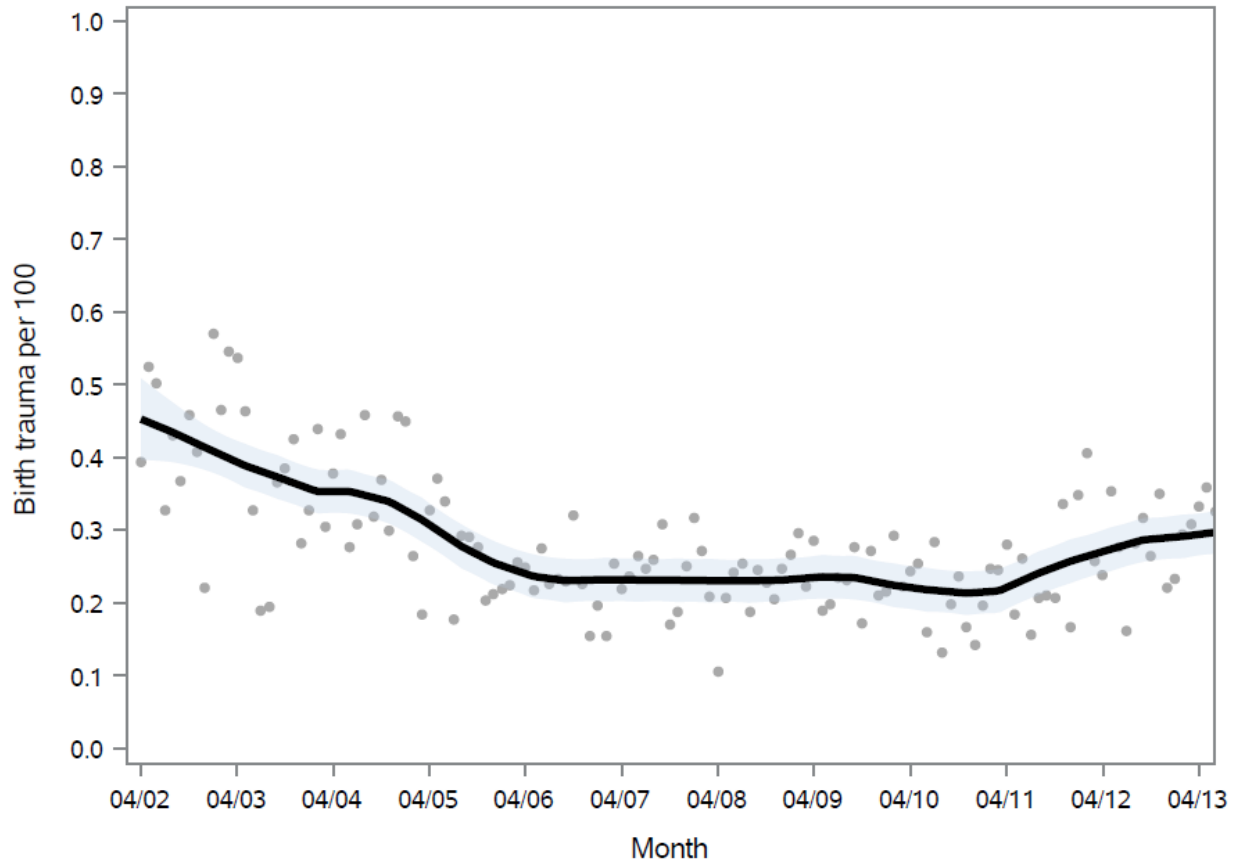

Footnote: Neonatal birth trauma includes cerebral hemorrhage due to birth injury, skeletal injuries due to birth, injuries to spine and spinal cord, brachial plexus, facial nerve or other nerves.

Maternal unanticipated operative procedures rate

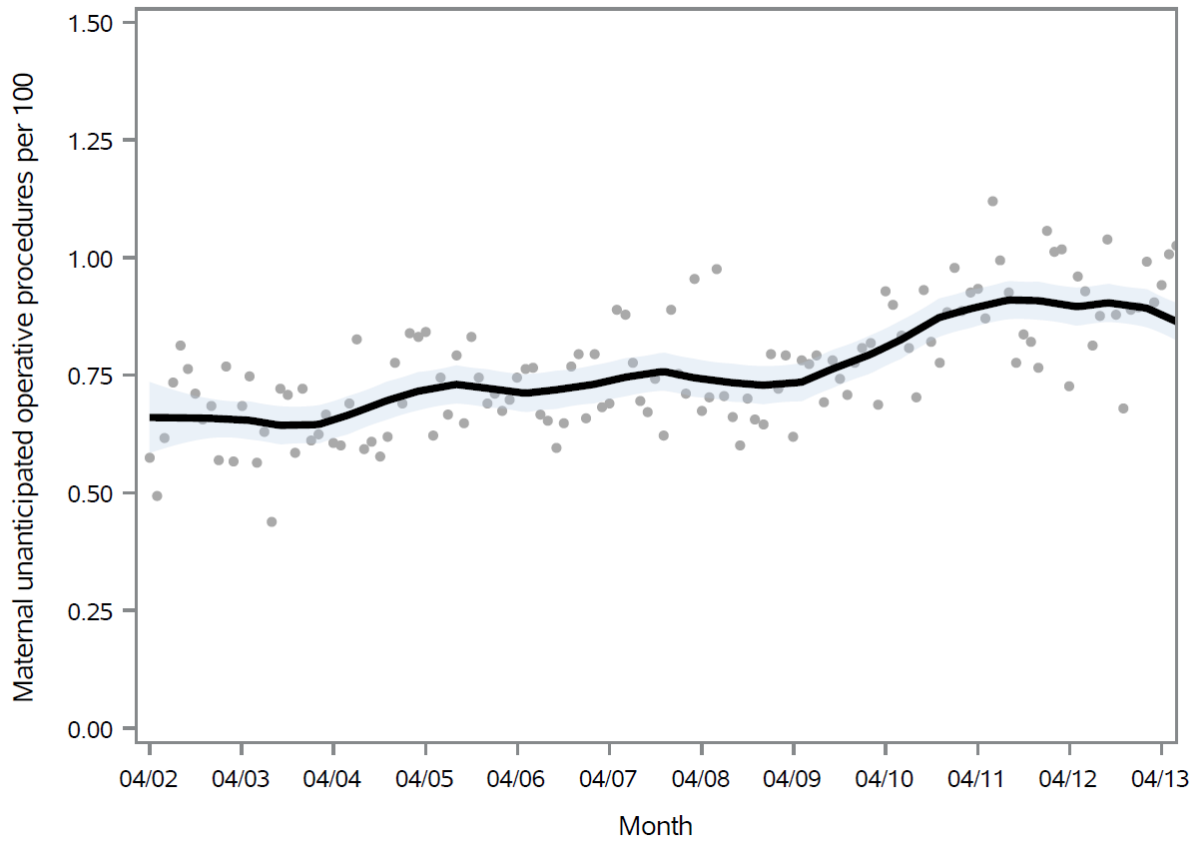

Footnote: Includes procedures to control post-partum bleeding such as D and C following delivery, control of post-partum hemorrhage by ligation or embolization, hysterectomy, etc.

NICU admission rate

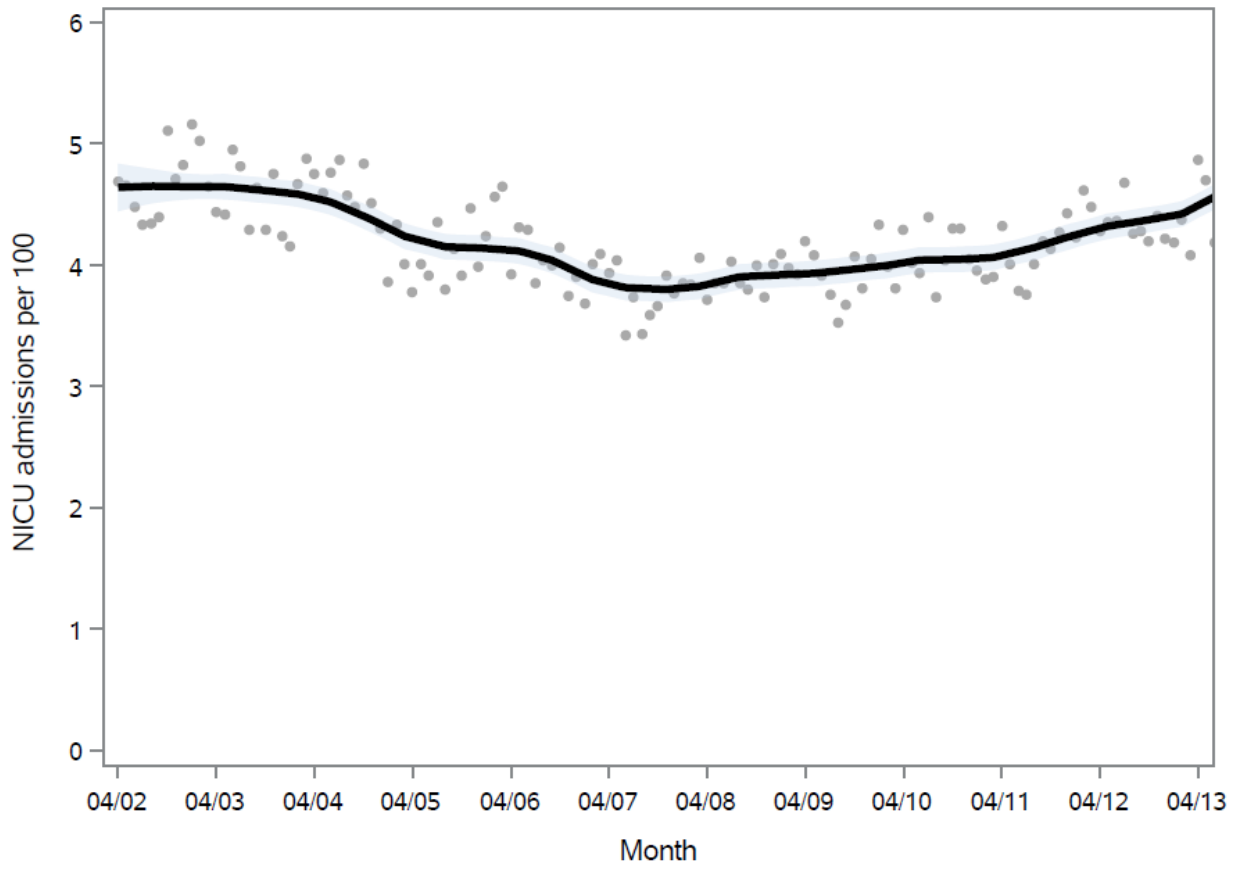



Blood transfusion rate

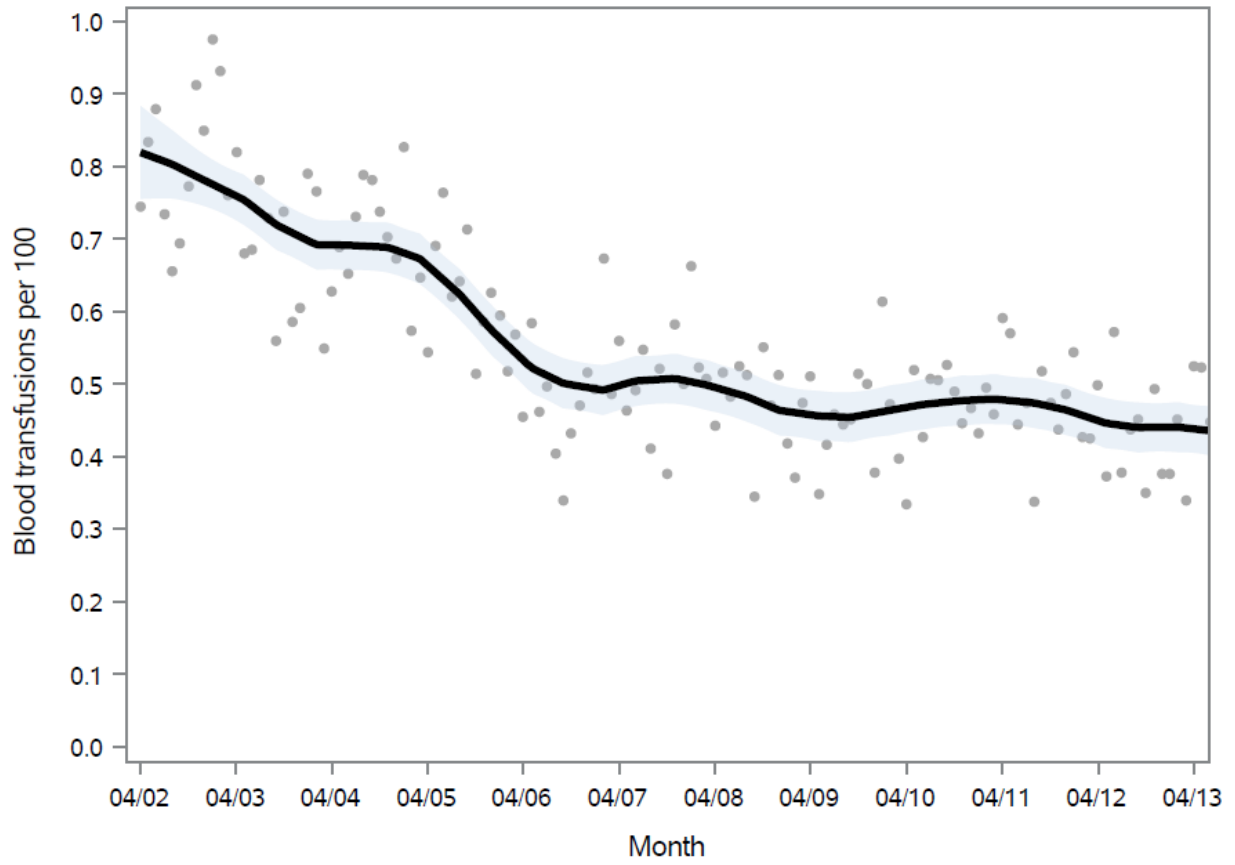

4th degree perineal tear rate

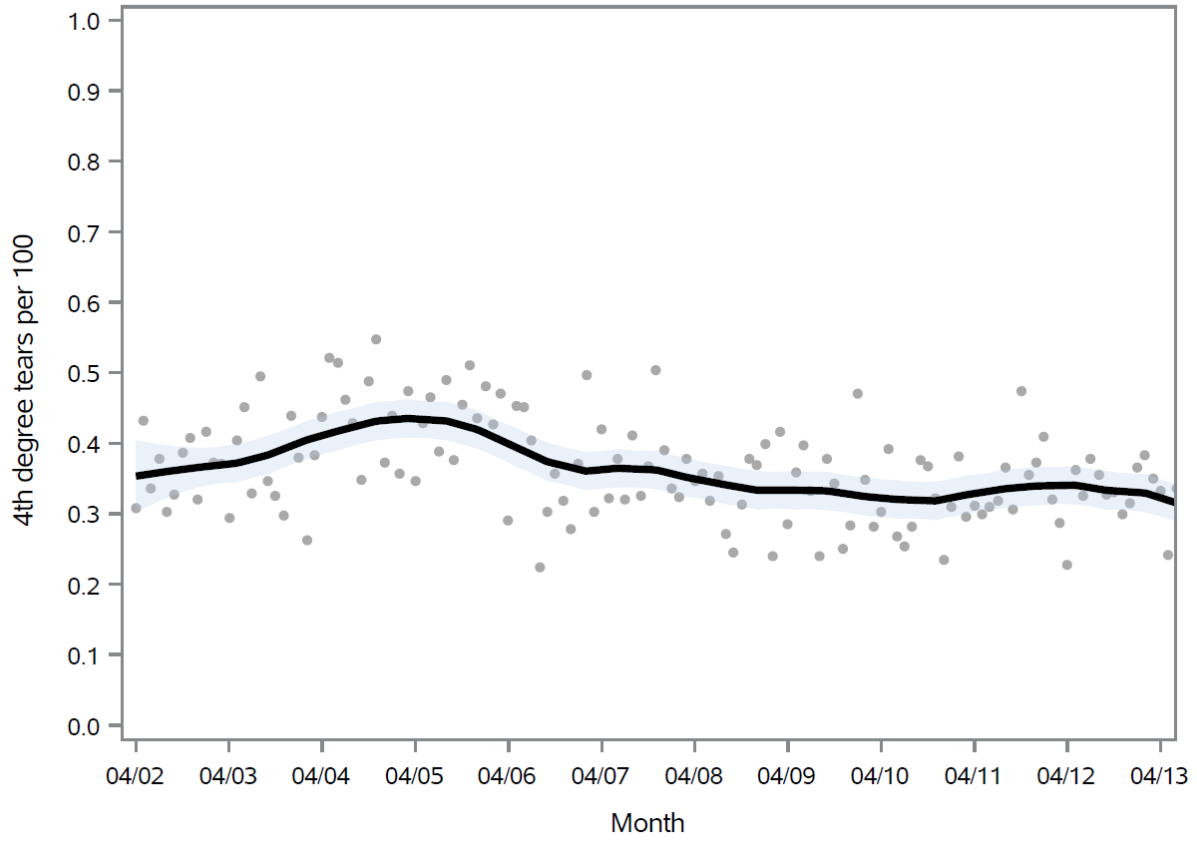

Supplement: MOESM2 [file 16699344]
