# Supplementary material for: Effect of implementation of the MOREOB program on adverse maternal and neonatal birth outcomes in Ontario, Canada: a retrospective cohort study
Source: Springer Nature journal article supplement (doi:10.1186/s12884-019-2296-5), 2019-05-03

**Additional file 4: Underlying secular trend for WAOS and mAOI, using time modeled as a continuous with a restricted cubic spline function**

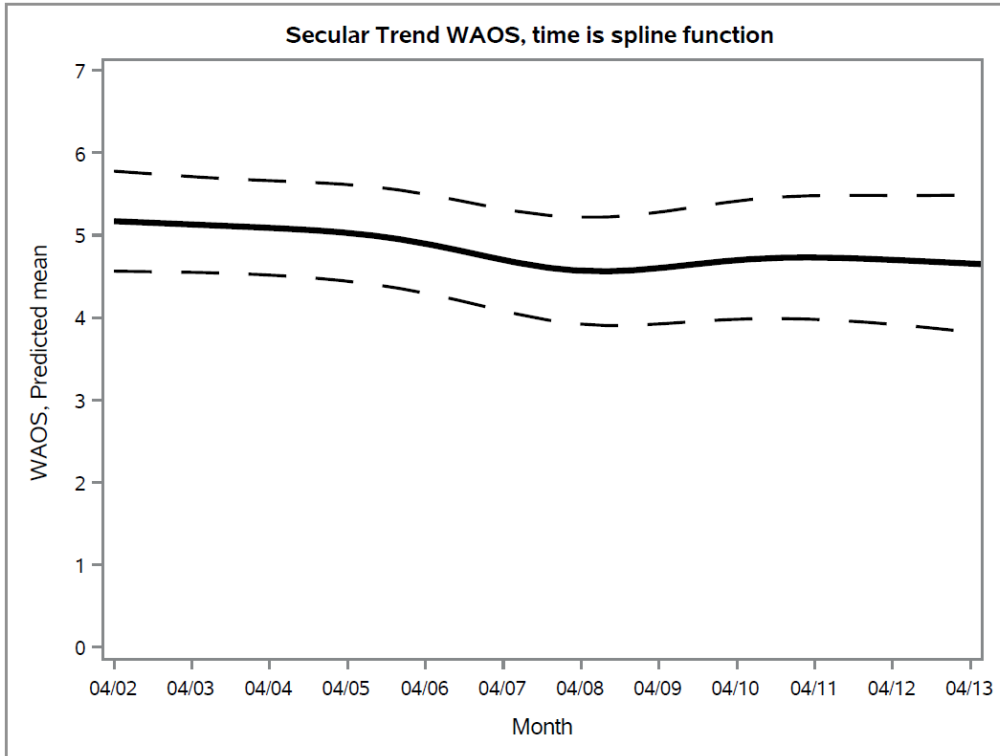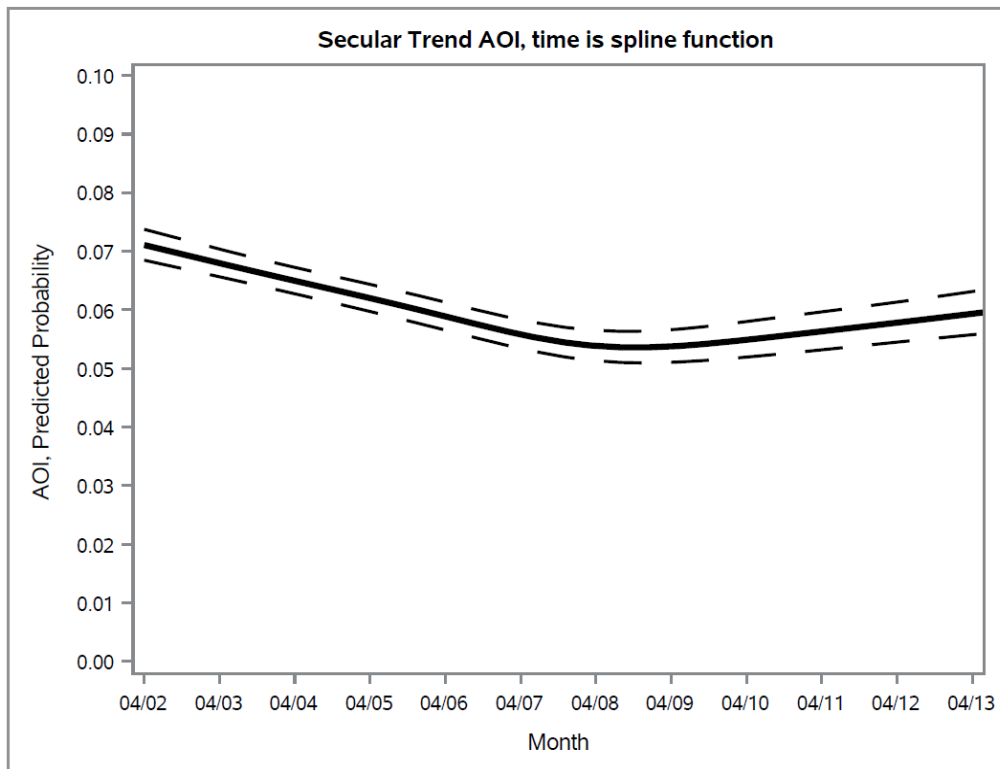

Supplement: MOESM4 [file 16699344]
